# Supplementary material for: A point mutation in Semaphorin 4A associates with defective endosomal sorting and causes retinal degeneration
Source: PubMed Central journal article supplement — Nat Commun. 2013 Jan 29;4:1406–. doi: 10.1038/ncomms2420 (PMC3562463; doi:10.1038/ncomms2420), 2013-01-29
Supplement: ncomms2420-s1.pdf [file ncomms2420-s1.pdf]

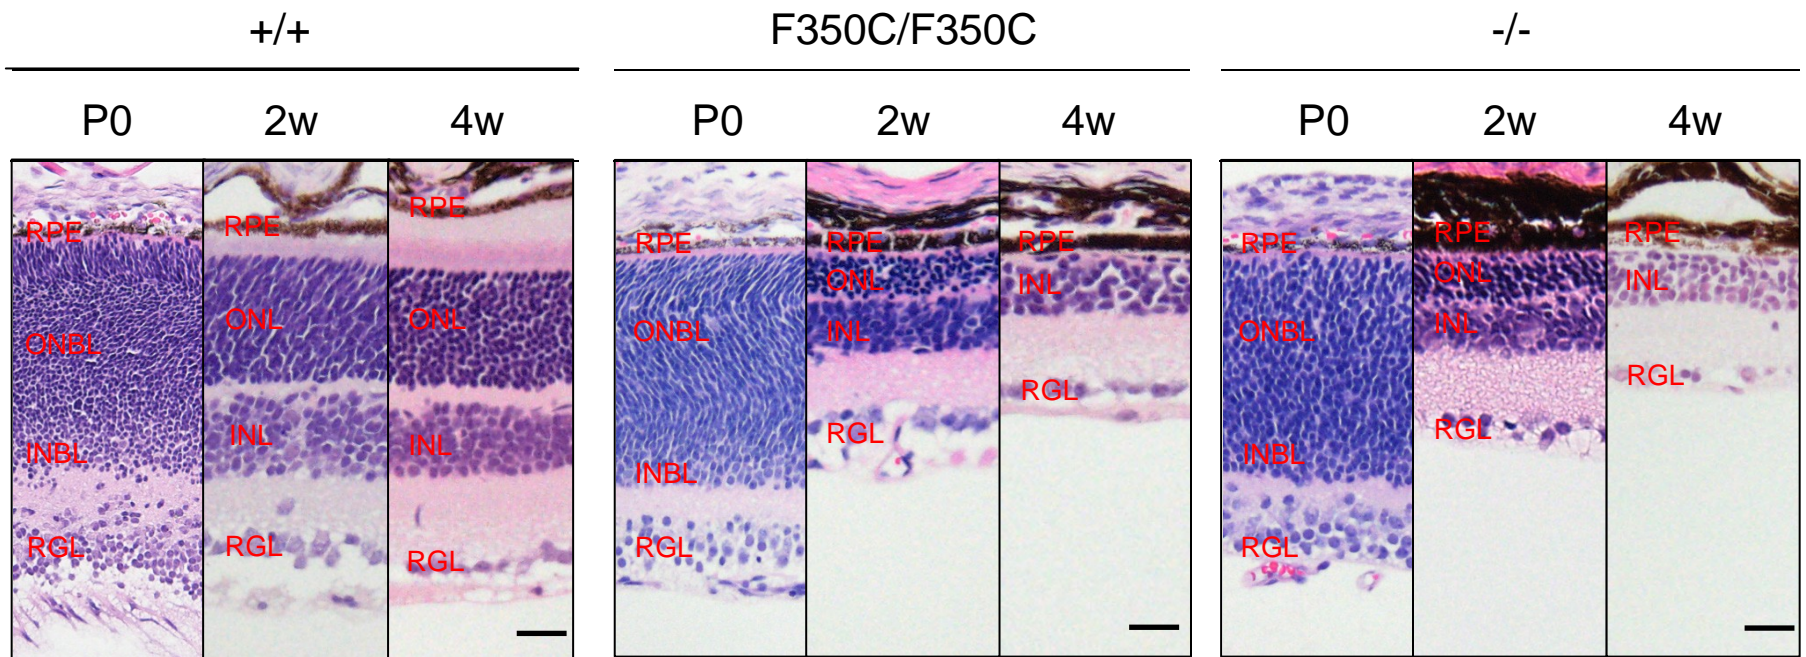

**Supplementary Figure S1. Time-course study of histological changes in *Sema4A*<sup>F350C/F350C</sup> retina.**

Hematoxylin and eosin (HE) staining of retinas of wild-type (*Sema4A*<sup>+/+</sup>), *Sema4A*<sup>F350C/F350C</sup>, and *Sema4A*<sup>-/-</sup> mice. The histology of every mouse was evaluated immediately after birth (P0), at 2 weeks of age (2w), or at 4 weeks of age (4w). Scale bars, 50 μm. RPE, retinal pigment epithelium; ONBL, outer neuroblastic layer; INBL, inner neuroblastic layer; ONL, outer nuclear layer; INL, inner nuclear layer; RGL, retinal ganglion layer.

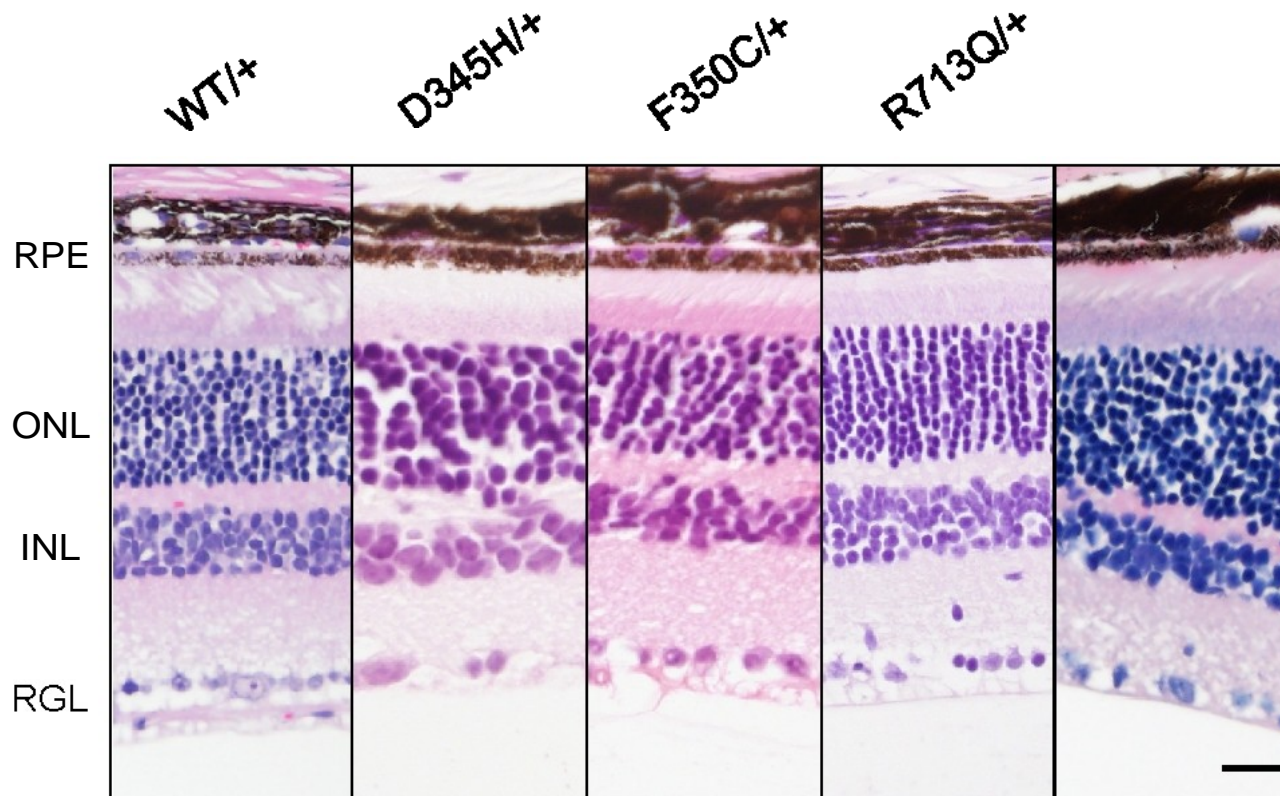

**Supplementary Figure S2. Heterozygous knock-in mice do not exhibit photoreceptor degeneration.** Hematoxylin and eosin (HE) staining of retinas in *Sema4A*<sup>WT/+</sup>, *Sema4A*<sup>D345H/+</sup>, *Sema4A*<sup>F350C/+</sup>, *Sema4A*<sup>R713Q/+</sup>, and *Sema4A*<sup>-/-</sup> mice. As shown, none of the heterozygous knock-in mice showed retinal photoreceptor degeneration. Scale bars, 50  $\mu$ m.

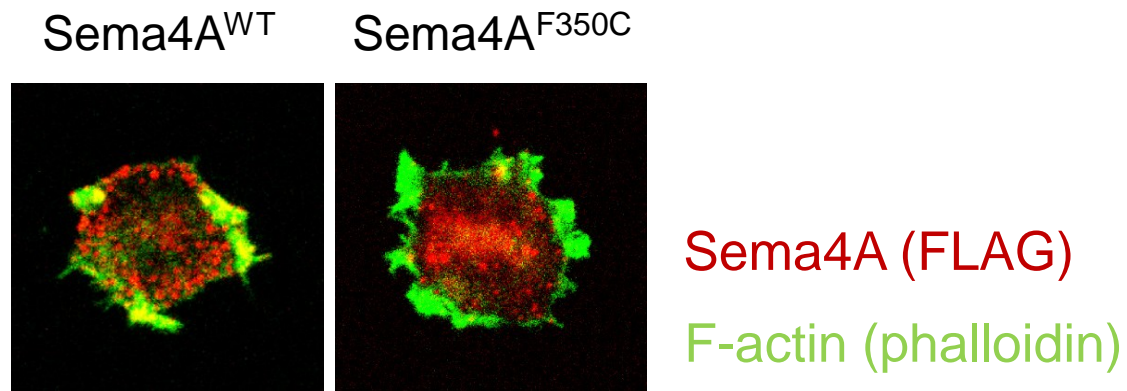

**Supplementary Figure S3. Lentiviral vectors efficiently express the Sema4A-FLAG proteins.**

293T cells were transfected with lentiviral vectors encoding Sema4A<sup>WT</sup>-FLAG or Sema4A<sup>F350C</sup>-FLAG, fixed and immunolabeled with a Cy5-conjugated anti-FLAG antibody. As shown in the representative images, the Sema4A<sup>F350C</sup>-FLAG protein did not localize to the plasma membrane, including lamellipodia, whereas Sema4A<sup>WT</sup>-FLAG was present at the plasma membrane. Scale bars, 10  $\mu$ m.

**Supplementary Table S1. Primer sequences for preparation of lentiviral vectors.**

| primer          | sequence                                   |
|-----------------|--------------------------------------------|
| AgeI-Sema4A-Fow | 5'-CATGACCGGTCTGACCATGGCCCTACCATCCC-3'     |
| FLAG-EcoRI-Rev  | 5'-GTCAGAATTCGGGATCACTACTTGTCATCGTCATCC-3' |
